# Supplementary material for: Optimization of in vitro inhibition of HT-29 colon cancer cell cultures by Solanum tuberosum L. extracts
Source: Royal Society of Chemistry journal article supplement (doi:10.1039/c4fo00649f), 2014-10-15
Supplement: c4fo00649f1.pdf [file c4fo00649f1.pdf]

**Table S3** Percent growth inhibition of HT-29 colon cancer cells by CO97216-1P/P extracts (mg·mL<sup>-1</sup> cell culture medium) after 24 hours. Data are means of all replicates (%). Three biological replicates were tested except where indicated as n = (). % Growth inhibition data represented in this table were ratio transformed to conduct Tukey's HSD analysis. Means followed by the same letter are not significantly different based on Tukey's HSD, P=0.05. Data are not available for n/a because not tested. Table does not reflect all significant comparisons.

| Potato Extract Concentration<br>[mg·mL <sup>-1</sup> cell culture medium] | Raw            |              |            |      | Boil (97 °C) |          |          |      |
|---------------------------------------------------------------------------|----------------|--------------|------------|------|--------------|----------|----------|------|
|                                                                           | 2008 (n)       | 2009 (n)     | 2010 (n)   | Mean | 2008 (n)     | 2009 (n) | 2010 (n) | Mean |
| <b>Stage II Immature</b>                                                  |                |              |            |      |              |          |          |      |
| 3.6                                                                       | 38.4 (5) a b c | 14.9 (5) b c | 0 c        | 18   | n/a n/a      | n/a n/a  | 0 c      | 0    |
| 7.2                                                                       | 32.2 (5) a b c | 57.2 (5) a   | 47.3 a b   | 45.6 | n/a n/a      | n/a n/a  | 0 c      | 0    |
| 14.4                                                                      | 310 (5) a b c  | 42.4 (5) a b | 38.8 a b c | 37.4 | n/a n/a      | n/a n/a  | 0 c      | 0    |
| <b>Stage III Intermediate</b>                                             |                |              |            |      |              |          |          |      |
| 3.6                                                                       | n/a n/a        | n/a n/a      | 0 c        | 0    | n/a n/a      | n/a n/a  | 0 c      | 0    |
| 7.2                                                                       | n/a n/a        | n/a n/a      | 8.9 b c    | 0    | n/a n/a      | n/a n/a  | 0 c      | 0    |
| 14.4                                                                      | n/a n/a        | n/a n/a      | 34.5 a b c | 0    | n/a n/a      | n/a n/a  | 0 c      | 0    |
| <b>Stage IV Intermediate</b>                                              |                |              |            |      |              |          |          |      |
| 3.6                                                                       | n/a n/a        | n/a n/a      | 0 c        | 0    | n/a n/a      | n/a n/a  | 0 c      | 0    |
| 7.2                                                                       | n/a n/a        | n/a n/a      | 0 c        | 0    | n/a n/a      | n/a n/a  | 0 c      | 0    |
| 14.4                                                                      | n/a n/a        | n/a n/a      | 16.3 b c   | 16.3 | n/a n/a      | n/a n/a  | 0 c      | 0    |
| <b>Stage V Mature</b>                                                     |                |              |            |      |              |          |          |      |
| 3.6                                                                       | 0 c            | 0 c          | 0 c        | 0    | n/a n/a      | n/a n/a  | 0 c      | 0    |
| 7.2                                                                       | 0 c            | 0 c          | 17 c       | 0.6  | n/a n/a      | n/a n/a  | 0 c      | 0    |
| 14.4                                                                      | 0 c            | 4.1 c        | 30.1 a b c | 11.4 | n/a n/a      | n/a n/a  | 13.4 b c | 13.4 |
| <b>Stage V (6 month storage)</b>                                          |                |              |            |      |              |          |          |      |
| 3.6                                                                       | n/a            | n/a          | n/a        | n/a  | n/a n/a      | n/a n/a  | n/a n/a  | n/a  |
| 7.2                                                                       | 0 c            | n/a          | n/a        | 0    | n/a n/a      | n/a n/a  | n/a n/a  | n/a  |
| 14.4                                                                      | n/a            | n/a          | n/a        | n/a  | n/a n/a      | n/a n/a  | n/a n/a  | n/a  |



**Table S5** Three to five biological replicates of cultivars and selections were harvested during specified years and utilized in different phases of research to examine differences in inhibitory activity due to developmental stage, cooking mode, caspase -3 activities, preparation processes, plant components and thermal degradation properties of heated extracts compared to heated tubers.

| Cultivars and Clonal Selections | Developmental Stage (Tubers from Developmental Stage II, III, IV, V) | Cooking Mode: Raw (Tubers from Developmental Stage II, III, IV, V) | Cooking Mode: Boiled (Tubers from Developmental Stage II, III, IV, V) | Caspase-3 Protease Activity (Developmental Stage II Tubers) | Plant Component: Potato Peel vs. Potato Flesh vs. Whole Tuber (Developmental Stage II Tubers) | Plant Component: Potato Flower | Heated Extracts vs. Heated Tubers (Developmental Stage II Tubers Stored for 6 Months in Dark Conditions at 4 °C) | Preparation Process: Freeze Dried vs. Cryogenically Ground (Developmental Stage II Tubers Stored for 6 Months in Dark Conditions at 4 °C) |
|---------------------------------|----------------------------------------------------------------------|--------------------------------------------------------------------|-----------------------------------------------------------------------|-------------------------------------------------------------|-----------------------------------------------------------------------------------------------|--------------------------------|------------------------------------------------------------------------------------------------------------------|-------------------------------------------------------------------------------------------------------------------------------------------|
| CO95 P2-3RU                     | 2008, 2009, 2010                                                     | 2008, 2009, 2010                                                   | 2010                                                                  |                                                             | 2011                                                                                          | 2011                           | 2010                                                                                                             | 2010                                                                                                                                      |
| CO972 E-P/P                     | 2008, 2009, 2010                                                     | 2008, 2009, 2010                                                   | 2010                                                                  |                                                             | 2011                                                                                          |                                | 2010                                                                                                             | 2010                                                                                                                                      |
| CO972E-3P/PW                    | 2008, 2009, 2010                                                     | 2008, 2009, 2010                                                   | 2010                                                                  |                                                             |                                                                                               |                                |                                                                                                                  |                                                                                                                                           |
| CO972E-2R/R                     | 2008, 2009, 2010                                                     | 2008, 2009, 2010                                                   | 2010                                                                  |                                                             |                                                                                               |                                |                                                                                                                  |                                                                                                                                           |
| CO9722-3P/PW                    | 2008, 2009, 2010                                                     | 2008, 2009, 2010                                                   | 2010                                                                  |                                                             |                                                                                               |                                |                                                                                                                  |                                                                                                                                           |
| CO04058-7P/PW                   | 2009, 2010                                                           | 2009, 2010                                                         | 2010                                                                  |                                                             |                                                                                               |                                |                                                                                                                  |                                                                                                                                           |
| CO04058-3RW/RW                  | 2009, 2010                                                           | 2009, 2010                                                         | 2010                                                                  | 2010                                                        | 2011                                                                                          | 2011                           |                                                                                                                  |                                                                                                                                           |
| CO04061 R/RW                    | 2009, 2010                                                           | 2009, 2010                                                         | 2010                                                                  |                                                             |                                                                                               |                                |                                                                                                                  |                                                                                                                                           |
| Colorado Rose                   | 2008, 2009, 2010                                                     | 2008, 2009, 2010                                                   | 2010                                                                  |                                                             |                                                                                               |                                |                                                                                                                  |                                                                                                                                           |
| Mountain Rose                   | 2008, 2009, 2010                                                     | 2008, 2009, 2010                                                   | 2010                                                                  |                                                             | 2011                                                                                          |                                |                                                                                                                  |                                                                                                                                           |
| Purple Majesty                  | 2008, 2009, 2010                                                     | 2008, 2009, 2010                                                   | 2010                                                                  |                                                             | 2011                                                                                          |                                |                                                                                                                  |                                                                                                                                           |
| Rio Grande Russet               | 2008, 2009, 2010                                                     | 2008, 2009, 2010                                                   | 2010                                                                  |                                                             | 2011                                                                                          |                                |                                                                                                                  |                                                                                                                                           |
| Russet Nugget                   | 2008, 2009, 2010                                                     | 2008, 2009, 2010                                                   | 2010                                                                  |                                                             | 2011                                                                                          |                                |                                                                                                                  |                                                                                                                                           |

**Table S6** Planting dates, harvest dates, days to maturity and growing degree days by year (2008-2011) defining developmental stages utilized in this research.

| Developmental Stage                       | 2008          |                  |                  |                     | 2009          |                  |                  |                     | 2010          |                   |                  |                     | 2011          |                  |                  |                     |
|-------------------------------------------|---------------|------------------|------------------|---------------------|---------------|------------------|------------------|---------------------|---------------|-------------------|------------------|---------------------|---------------|------------------|------------------|---------------------|
|                                           | Planting Date | Harvest Date     | Days to Maturity | Growing Degree Days | Planting Date | Harvest Date     | Days to Maturity | Growing Degree Days | Planting Date | Harvest Date      | Days to Maturity | Growing Degree Days | Planting Date | Harvest Date     | Days to Maturity | Growing Degree Days |
| Stage I (Immature)                        | n/a           | n/a              | n/a              | n/a                 | n/a           | n/a              | n/a              | n/a                 | n/a           | n/a               | n/a              | n/a                 | n/a           | n/a              | n/a              | n/a                 |
| Stage II (Immature)                       | 5th of May    | 30th of July     | 48               | 942.0               | 1st of June   | n/a              | 33               | 852.5               | 18th of May   | 25th of July      | 50               | 945.5               | 25th of May   | 10th of August   | 29               | 1289.5              |
| Stage III (Intermediate)                  | n/a           | n/a              | n/a              | n/a                 | n/a           | n/a              | n/a              | n/a                 | 18th of May   | 31st of July      | 44               | 1053.0              | n/a           | n/a              | n/a              | n/a                 |
| Stage IV (Intermediate)                   | n/a           | n/a              | n/a              | n/a                 | n/a           | n/a              | n/a              | n/a                 | 18th of May   | 7th of August     | 37               | 1163.5              | n/a           | n/a              | n/a              | n/a                 |
| Stage V (Mature)                          | 5th of May    | 7th of September | 0                | 1538.5              | 1st of June   | 1th of September | 0                | 1284.0              | 18th of May   | 14th of September | 0                | 1518.5              | 25th of May   | 8th of September | 0                | 1794.0              |
| Stage V - 6 m (Mature - 6 Months Storage) | 5th of May    | 17th of February | +6 months        | 1538.5              | 1st of June   | 1th of September | +6 months        | 1284.0              | 18th of May   | 14th of February  | +6 months        | 1518.5              | n/a           | n/a              | n/a              | n/a                 |
